# Supplementary material for: Allele-Specific Chromatin Immunoprecipitation Studies Show Genetic Influence on Chromatin State in Human Genome
Source: PLOS journal article supplement (doi:10.1371/journal.pgen.0030081), 2007-05-14
Supplement: S3 (10.1371/journal.pgen.0030081.s003) [file journal.pgen.0030081.s003]

| SAMPLE  | FAMILY | RELATION | ID  |
|---------|--------|----------|-----|
| GM10858 | 1347   | father   | 1   |
| GM10859 | 1347   | mother   | 2   |
| GM11870 | 1347   | daughter | 3   |
| GM11871 | 1347   | son      | 4   |
| GM11872 | 1347   | son      | 5   |
| GM11875 | 1347   | daughter | 6   |
| GM10860 | 1362   | father   | 7   |
| GM10861 | 1362   | mother   | 8   |
| GM11982 | 1362   | daughter | 9   |
| GM11983 | 1362   | daughter | 10  |
| GM11984 | 1362   | son      | 11  |
| GM11987 | 1362   | son      | 12  |
| GM07057 | 1331   | father   | 13f |
| GM06990 | 1331   | mother   | 14m |
| GM07023 | 1331   | daughter | 15d |
| GM07033 | 1331   | son      | 16s |
| GM07059 | 1331   | daughter | 17d |
| GM06983 | 1331   | son      | 18s |
| GM10832 | 1413   | father   | 19f |
| GM10833 | 1413   | mother   | 20m |
| GM12101 | 1413   | son      | 21s |
| GM12102 | 1413   | son      | 22s |
| GM12104 | 1413   | daughter | 23d |
| GM12105 | 1413   | daughter | 24d |
